# Supplementary material
Source: bioRxiv or medRxiv preprint supplement (https://www.biorxiv.org/highwire/filestream/21482/field_highwire_adjunct_files/6/077701-2.pdf)

**A**

374 Pathways

Cancer Hallmarks

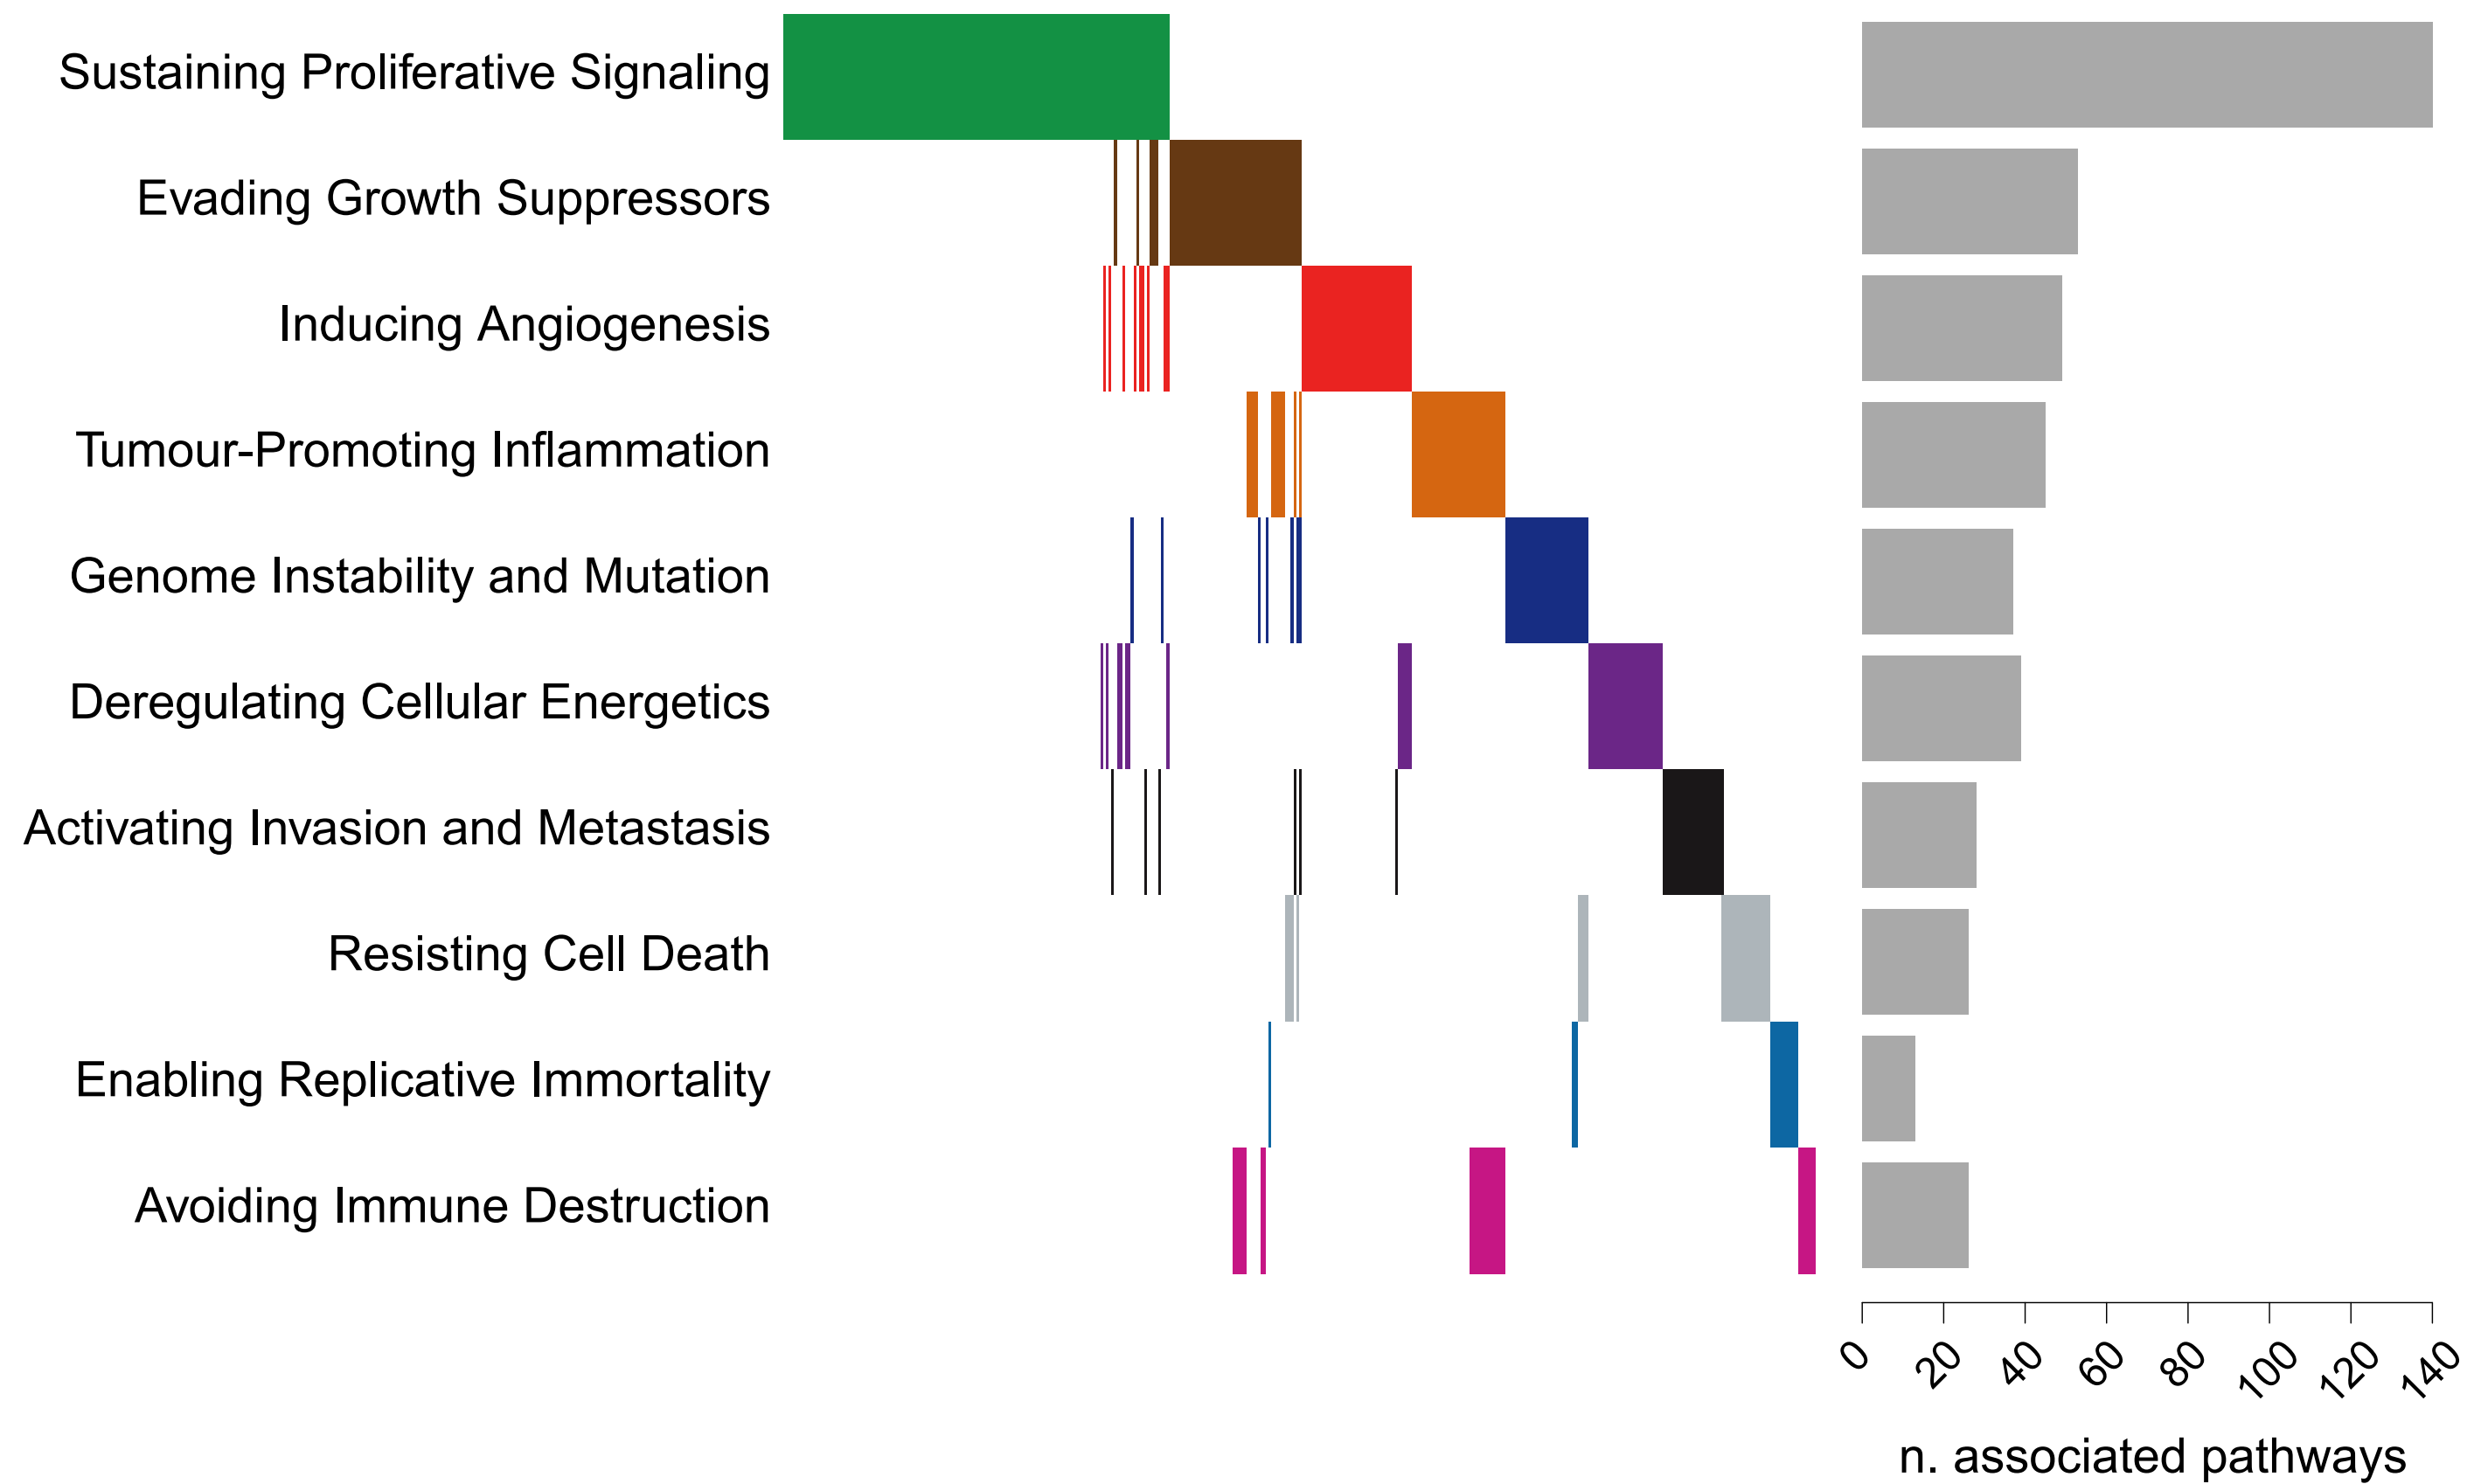**B**

3915 Genes

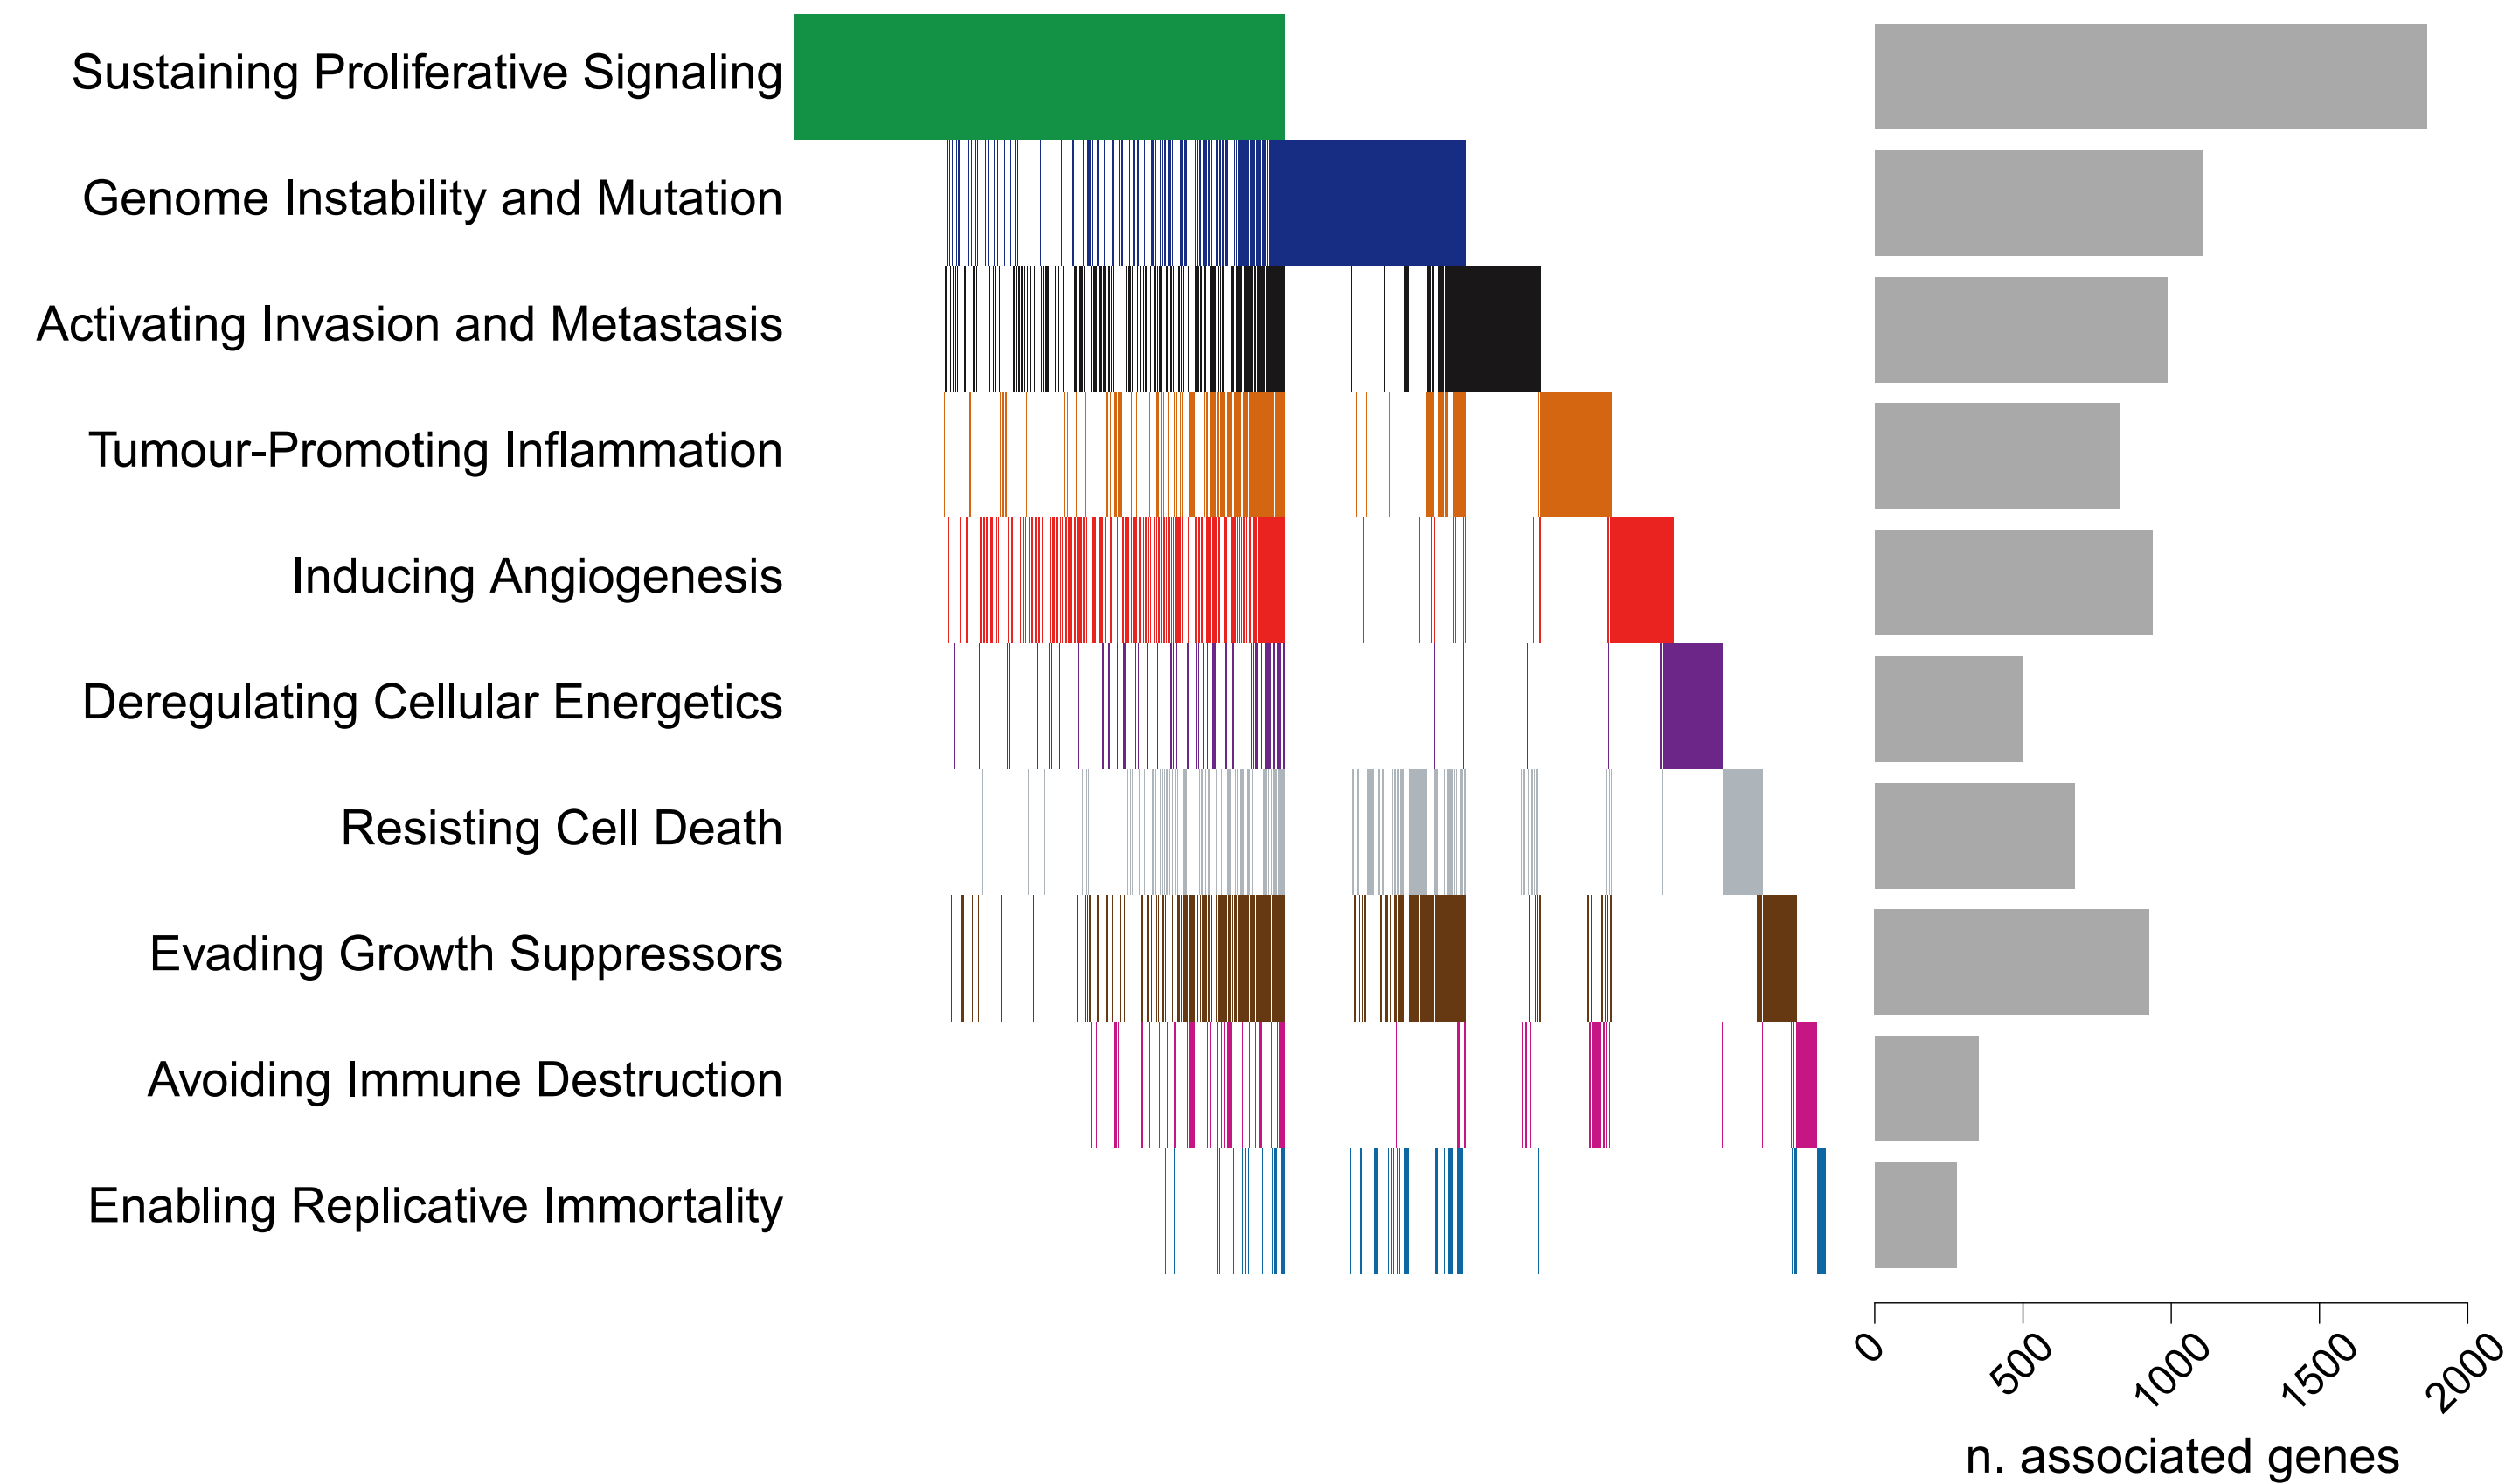**C**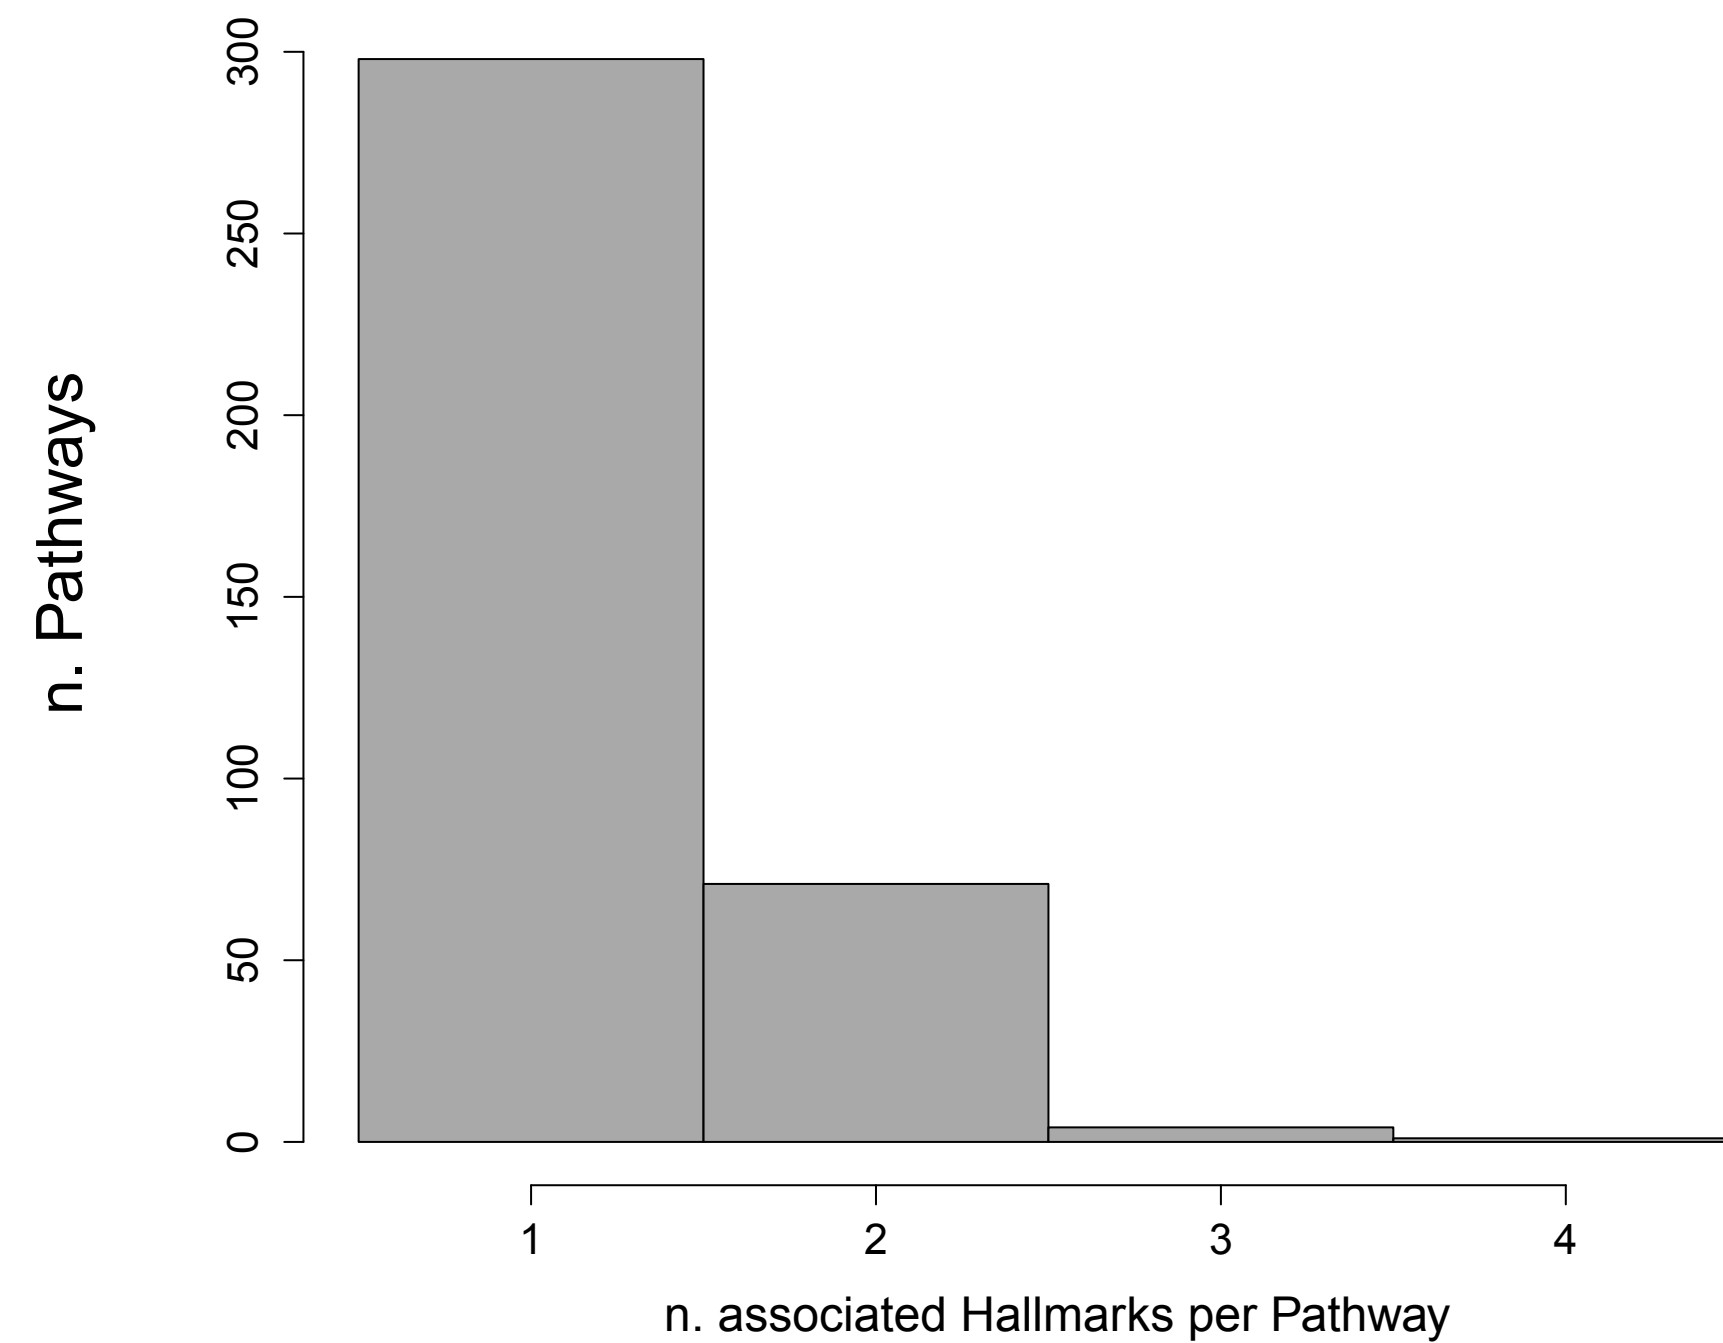**D**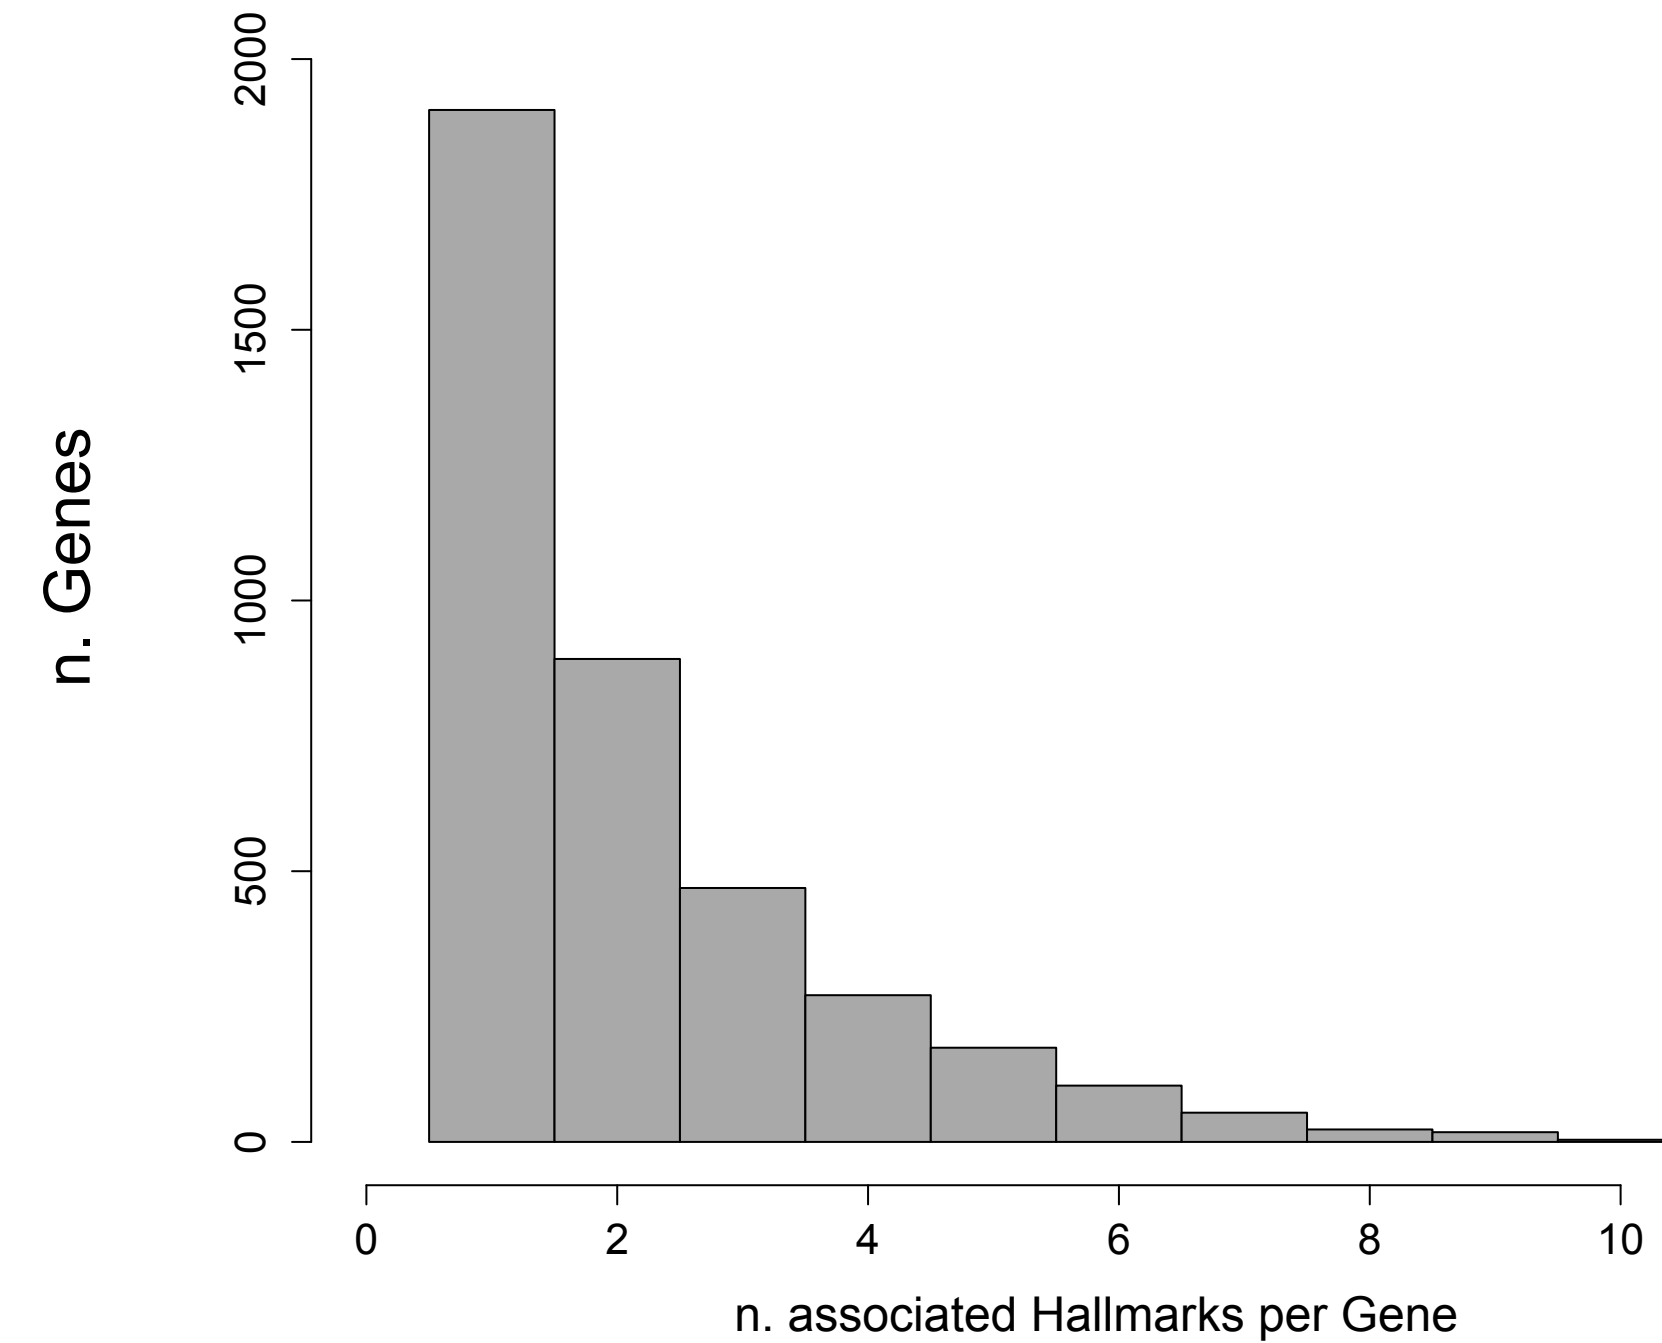**E**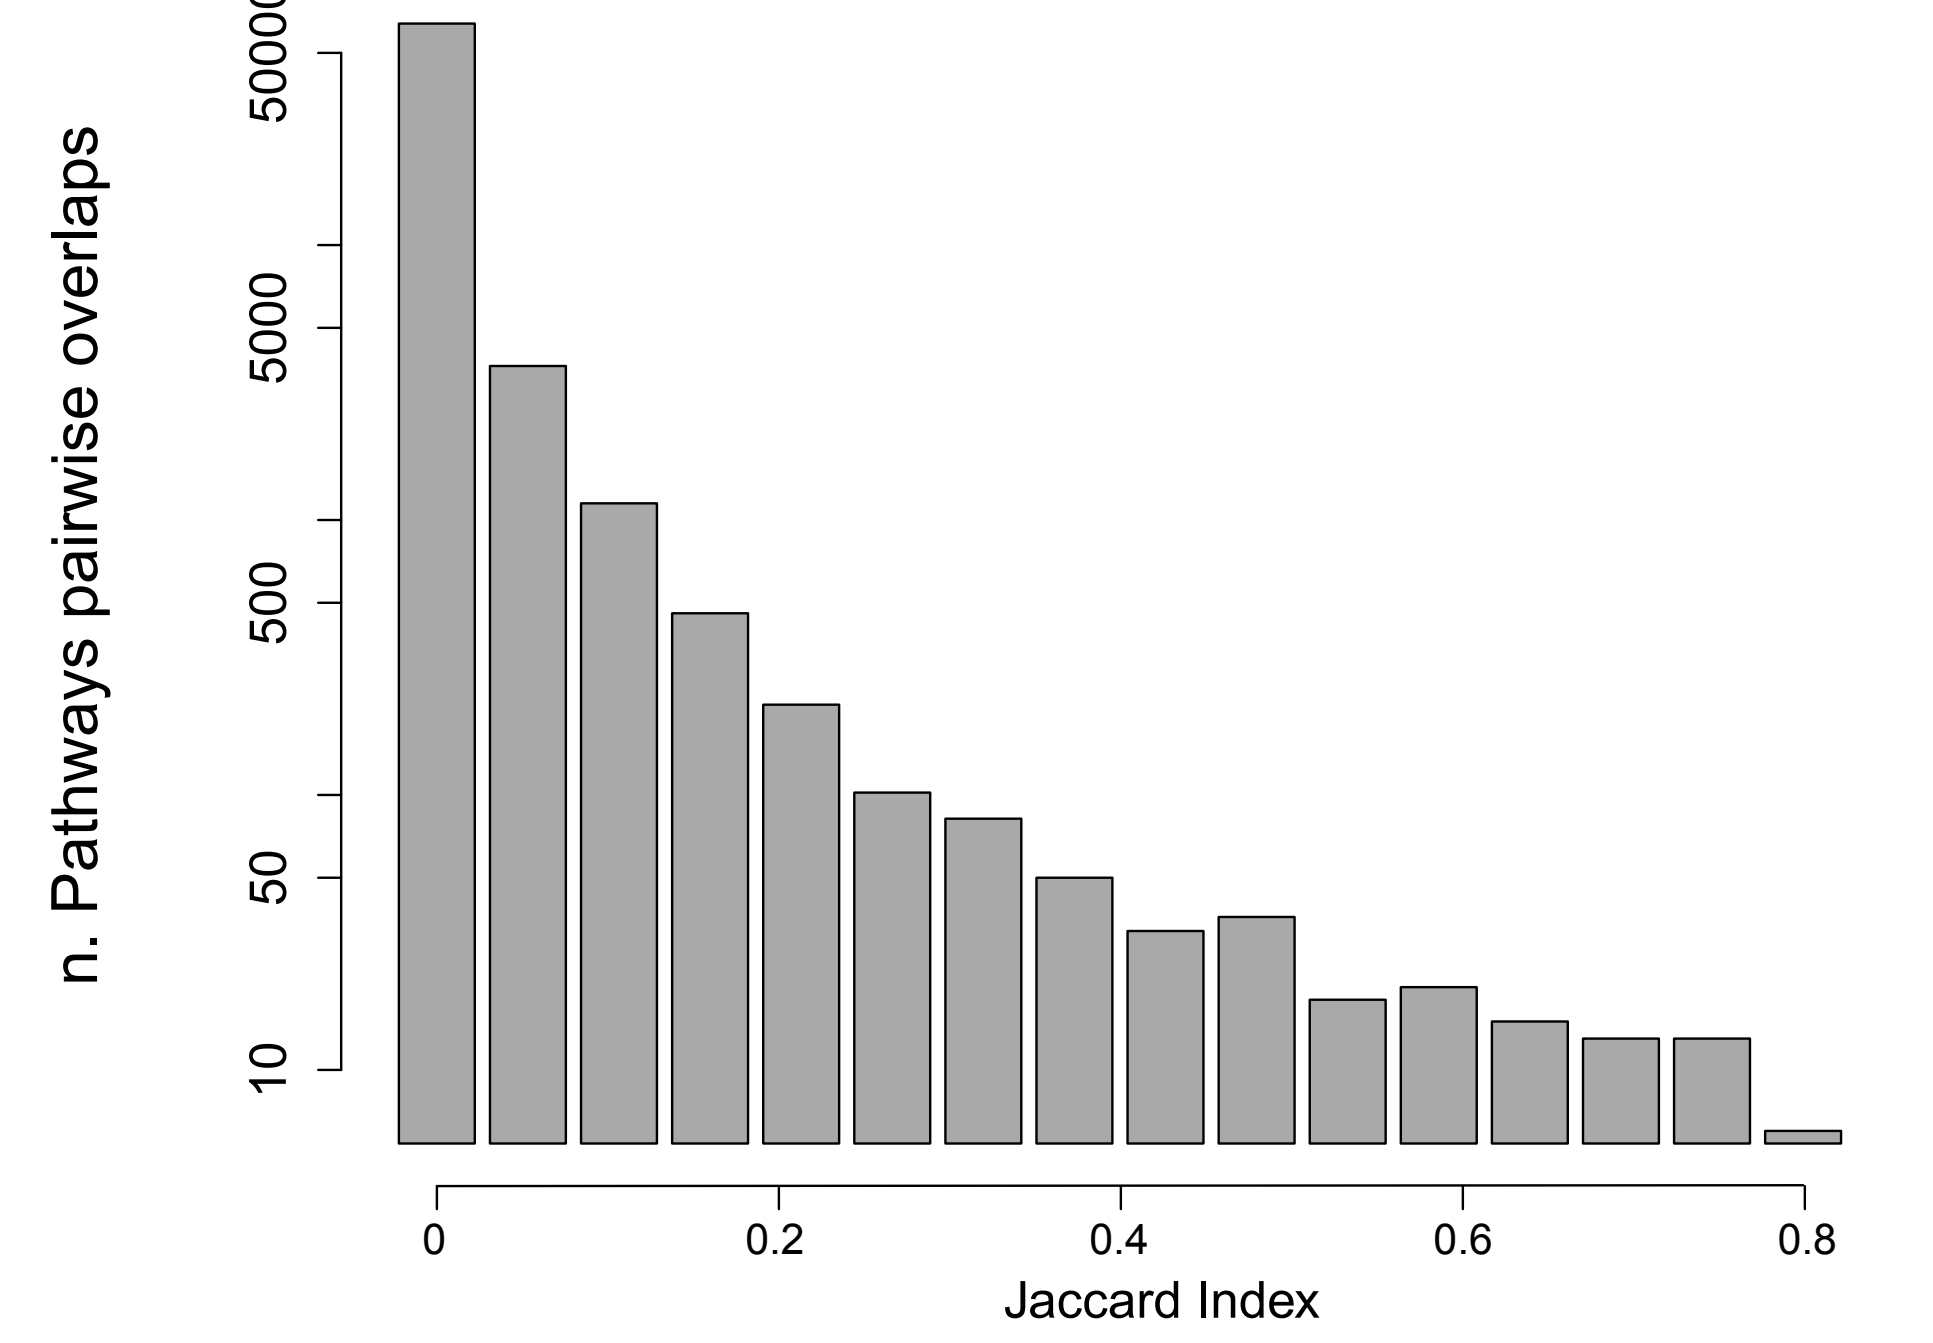

Supplement: Supplementary file [file 077701-2.pdf]
